# Supplementary material for: Mechanistic insights into the catalytic transfer hydrogenation of furfural to furfuryl alcohol over a N-doped carbon-supported Ni single atom catalyst from first principles
Source: Royal Society of Chemistry journal article supplement (doi:10.1039/d3nj01413d), 2023-01-01
Supplement: d3nj01413d1.pdf [file d3nj01413d1.pdf]

## Supplementary Information

### Mechanistic Insight into Catalytic Transfer Hydrogenation of Furfural to Furfuryl Alcohol over N-Doped Carbon-Supported Ni Single Atom Catalyst from First Principles

Fan Yang and Wenzhen Lai\*

Key Laboratory of Advanced Light Conversion Materials and Biophotonics, Department of  
Chemistry, Renmin University of China, Beijing, 100872, China

Corresponding author email: [wenzhenlai@ruc.edu.cn](mailto:wenzhenlai@ruc.edu.cn)

(a) NiN<sub>4</sub>/NC

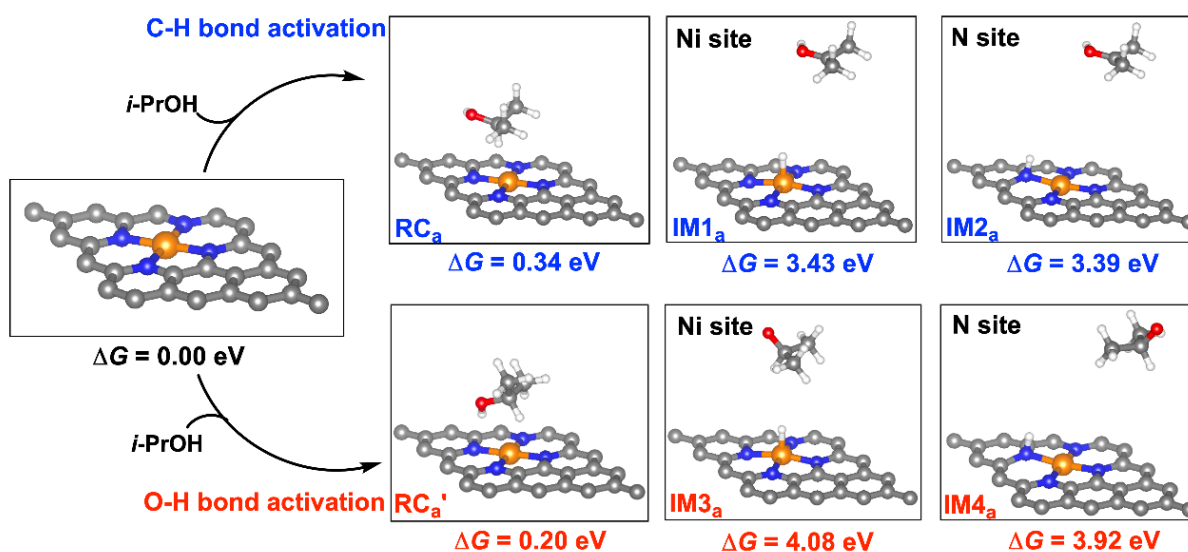

(b) N<sub>1</sub>

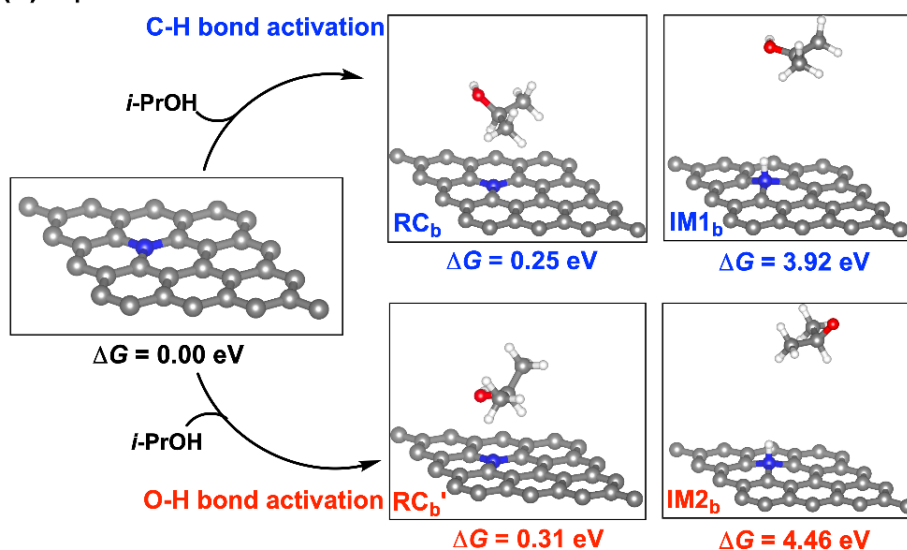

(c) N<sub>1</sub>V<sub>1</sub>

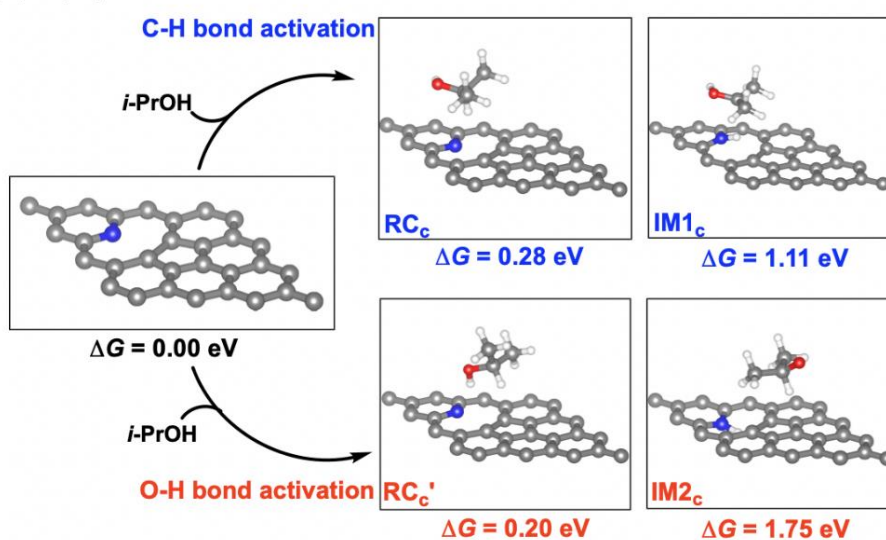

Continued

(d) pyridinic N<sub>3</sub>V<sub>1</sub>

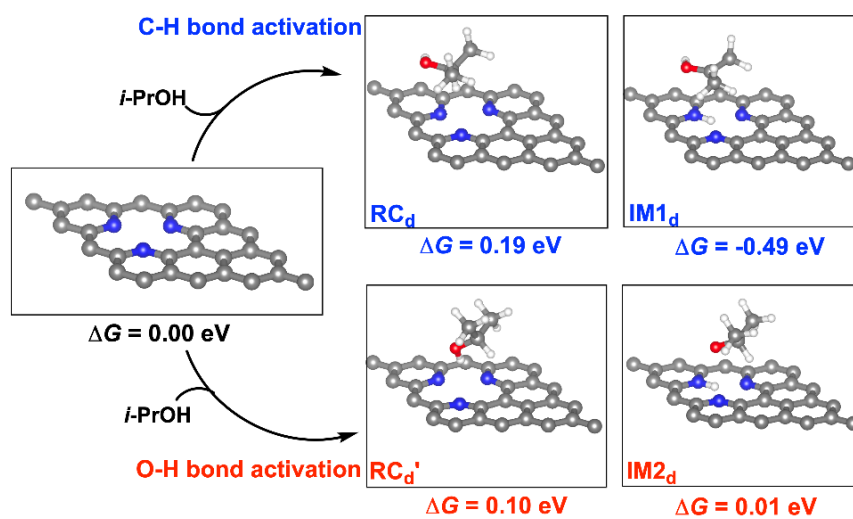

(e) pyridinic N<sub>4</sub>V<sub>2</sub>

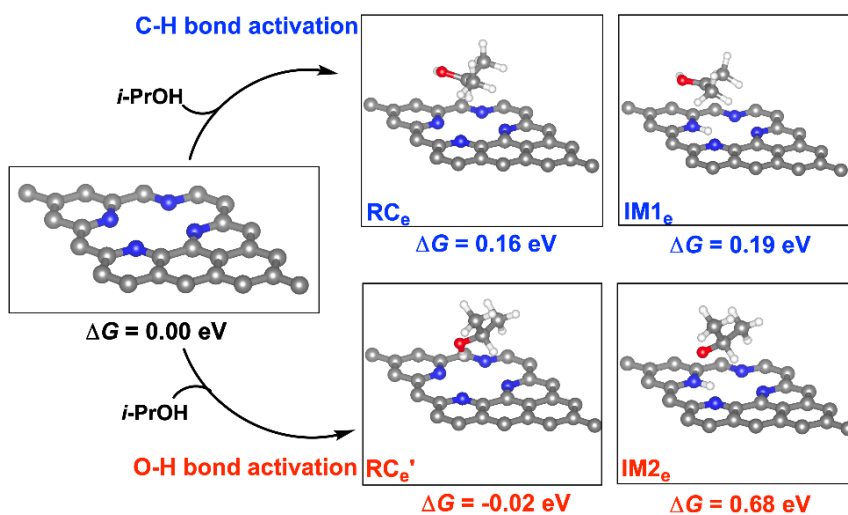

(f) pyridinic N<sub>2</sub>V<sub>2</sub>

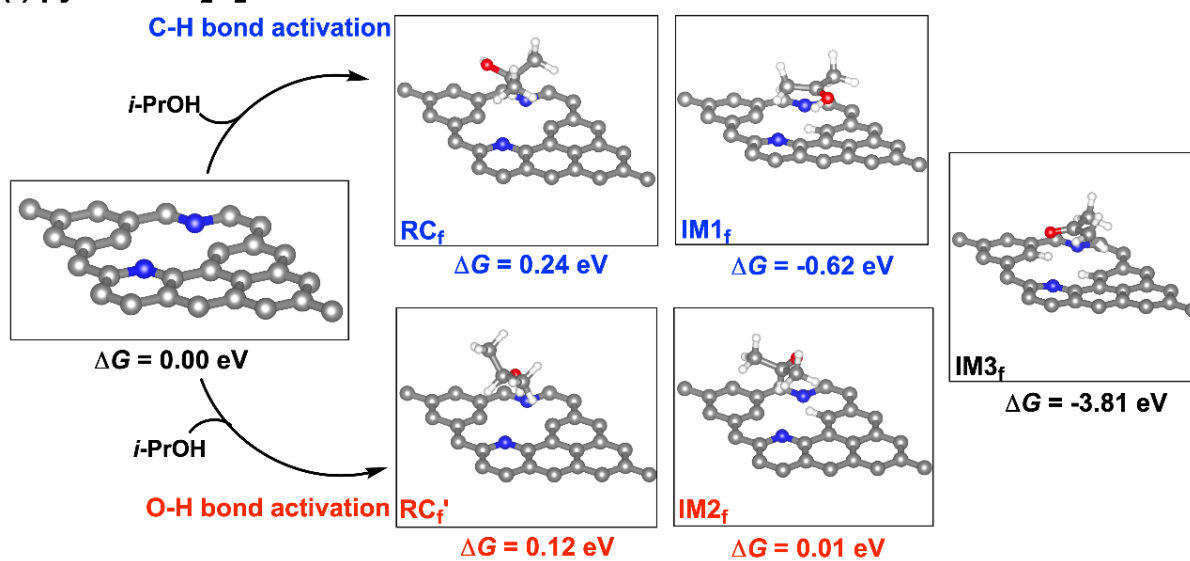

Continued

(g) pyrrolic  $N_3V_1$

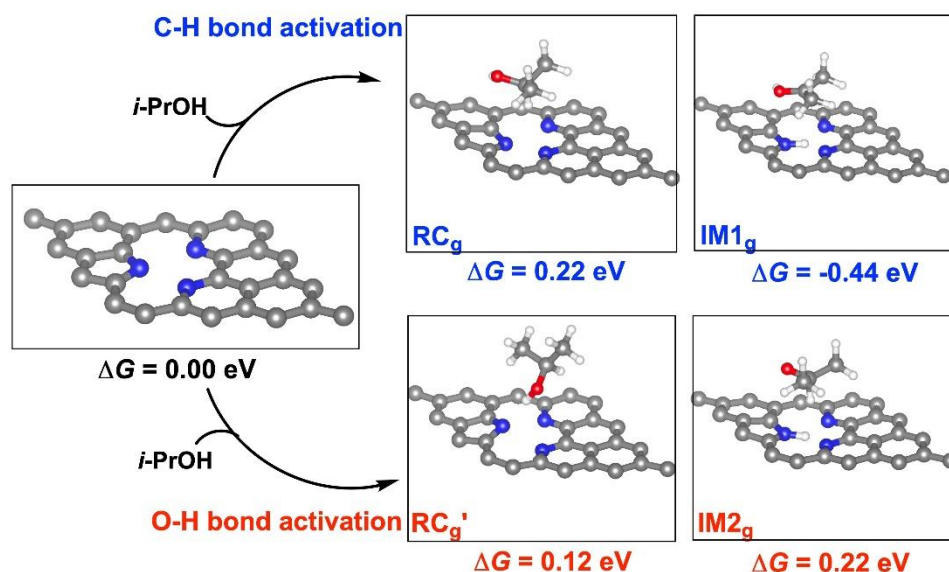

**Fig. S1.** Reaction pathway for the initial C-H/O-H bond activation of *i*-PrOH over different carbon materials: (a)  $\text{NiN}_4/\text{NC}$ , (b)  $\text{N}_1$ , (c)  $\text{N}_1\text{V}_1$ , (d) pyridinic  $\text{N}_3\text{V}_1$ , (e) pyridinic  $\text{N}_4\text{V}_2$ , (f) pyridinic  $\text{N}_2\text{V}_2$  and (g) pyrrolic  $\text{N}_3\text{V}_1$ , respectively.

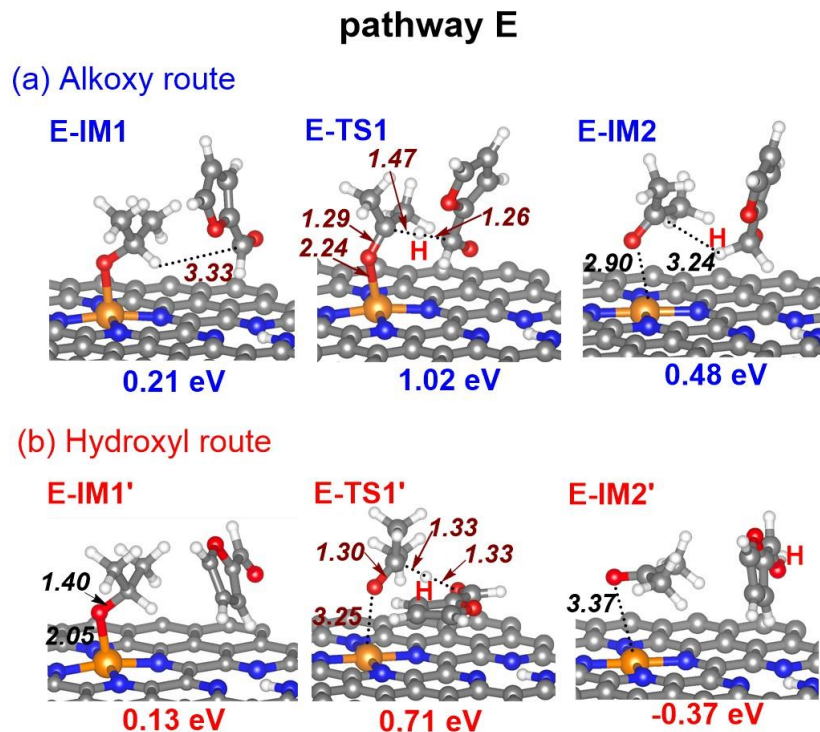

**Fig. S2.** Possible reaction pathways for the direct H transfer. The energies relative to **B-IM2'** and the isolated FF are given in eV.

## Absolute and Relative Energies of Involved Species

The detail of each intermediates' relative electron energy ( $E_{DFT}$ ), zero-point energy (ZPE), thermodynamic energy ( $\Delta U_{(0 \rightarrow T)}$ ), entropy contribution ( $T^*S$ ) and Gibbs free energy ( $G$ ) were shown in tables below.

$$H_{\text{gas}} = E_{DFT} + \text{ZPE} + \Delta U_{(0 \rightarrow T)} + P^*V;$$

$$H_{\text{ads}} = E_{DFT} + \text{ZPE} + \Delta U_{(0 \rightarrow T)}$$

$$G_{\text{gas}} = E_{DFT} + \text{ZPE} + \Delta U_{(0 \rightarrow T)} + P^*V - T^*S;$$

$$G_{\text{ads}} = E_{DFT} + \text{ZPE} + \Delta U_{(0 \rightarrow T)} - T^*S$$

**Table S1.** The electronic energy, thermodynamic corrections, enthalpy and free energies of the isolated molecules and carbon materials.

| INT                                                 | $E_{DFT}$<br>(eV) | ZPE<br>(eV) | $\Delta U_{(0 \rightarrow T)}$<br>(eV) | $P^*V$<br>(eV) | $H$<br>(eV) | $T^*S$<br>(eV) | $G$<br>(eV) |
|-----------------------------------------------------|-------------------|-------------|----------------------------------------|----------------|-------------|----------------|-------------|
| <i>i</i> -PrOH                                      | -63.656           | 2.85        | 0.24                                   |                | -60.530     | 1.24           | -61.765     |
| Acetone                                             | -56.042           | 2.20        | 0.23                                   | 0.0339         | -53.575     | 1.26           | -54.831     |
| FF                                                  | -72.047           | 2.09        | 0.25                                   |                | -69.668     | 1.32           | -70.984     |
| FA                                                  | -79.637           | 2.71        | 0.39                                   |                | -76.601     | 1.42           | -78.024     |
| NiN <sub>4</sub> /NC                                | -279.135          | 5.00        | 0.65                                   |                | -273.486    | 1.07           | -264.513    |
| N <sub>1</sub>                                      | -294.557          | 5.38        | 0.62                                   |                | -288.561    | 0.99           | -289.549    |
| N <sub>1</sub> V <sub>1</sub>                       | -281.112          | 5.12        | 0.63                                   |                | -275.358    | 1.06           | -276.422    |
| pyridinic N <sub>3</sub> V <sub>1</sub>             | -280.835          | 4.99        | 0.61                                   |                | -275.237    | 0.99           | -276.224    |
| pyridinic N <sub>4</sub> V <sub>2</sub>             | -270.603          | 4.88        | 0.60                                   | -              | -265.117    | 1.00           | -266.113    |
| pyridinic N <sub>2</sub> V <sub>2</sub>             | -268.966          | 4.88        | 0.63                                   |                | -263.453    | 1.06           | -264.513    |
| pyrrolic N <sub>3</sub> V <sub>1</sub>              | -279.185          | 5.08        | 0.65                                   |                | -273.460    | 1.10           | -274.561    |
| NiN <sub>4</sub> -N <sub>3</sub> V <sub>1</sub> /NC | -633.981          | 11.42       | 1.56                                   |                | -620.999    | 2.71           | -623.704    |
| H&H*                                                | -641.582          | 11.89       | 1.59                                   |                | -628.102    | 2.73           | -630.829    |

**Table S2.** The energies<sup>a</sup> of the key species involved in Fig. 2a.

| INT                                                                     | $E_{DFT}$<br>(eV) | ZPE<br>(eV) | $\Delta U_{(0 \rightarrow T)}$<br>(eV) | $H$<br>(eV) | $\Delta H$<br>(eV) | $T^*S$<br>(eV) | $G$<br>(eV) | $\Delta G$<br>(eV) |
|-------------------------------------------------------------------------|-------------------|-------------|----------------------------------------|-------------|--------------------|----------------|-------------|--------------------|
| NiN <sub>4</sub> -N <sub>3</sub> V <sub>1</sub> /NC<br>+ <i>i</i> -PrOH | -697.637          | 14.27       | 1.80                                   | -681.529    | 0.00               | 3.94           | -685.469    | 0.00               |
| <b>A-RC</b>                                                             | -698.032          | 14.29       | 1.89                                   | -681.853    | -0.32              | 3.43           | -685.283    | 0.19               |
| <b>A-TS1</b> <sub>N5</sub>                                              | -697.120          | 14.17       | 1.84                                   | -681.109    | 0.42               | 3.26           | -684.365    | 1.10               |
| <b>A-IM1</b> <sub>N5</sub>                                              | -698.508          | 14.27       | 1.88                                   | -682.362    | -0.83              | 3.41           | -685.769    | -0.30              |
| <b>A-TS1</b> <sub>N6</sub>                                              | -697.178          | 14.18       | 1.84                                   | -681.156    | 0.37               | 3.26           | -684.416    | 1.05               |
| <b>A-IM1</b> <sub>N6</sub>                                              | -698.474          | 14.23       | 1.88                                   | -682.356    | -0.83              | 3.42           | -685.778    | -0.31              |
| <b>A-TS1</b> <sub>N7</sub>                                              | -697.108          | 14.17       | 1.84                                   | -681.096    | 0.43               | 3.26           | -684.357    | 1.11               |
| <b>A-IM1</b> <sub>N7</sub>                                              | -698.464          | 14.27       | 1.88                                   | -682.318    | -0.79              | 3.40           | -685.718    | -0.25              |
| <b>A-IM2</b>                                                            | -698.540          | 14.25       | 1.87                                   | -682.417    | -0.89              | 3.38           | -685.796    | -0.33              |
| <b>A-TS2</b>                                                            | -698.277          | 14.17       | 1.83                                   | -681.996    | -0.47              | 3.27           | -683.457    | -0.08              |
| <b>A-IM3</b>                                                            | -698.635          | 14.31       | 1.86                                   | -682.028    | -0.50              | 3.37           | -682.457    | -0.37              |
| <b>A-TS2'</b>                                                           | -697.960          | 14.11       | 1.85                                   | -682.274    | -0.75              | 3.31           | -685.308    | 0.16               |
| <b>A-IM3'</b>                                                           | -698.010          | 14.09       | 1.90                                   | -682.466    | -0.94              | 3.44           | -685.465    | 0.00               |

<sup>a</sup> $\Delta H_{INT} = H_{INT} - (H_{NiN_4-N_3V_1/NC} + H_{i-PrOH})$ , where  $H_{INT}$ ,  $H_{NiN_4-N_3V_1/NC}$  and  $H_{i-PrOH}$  are the enthalpy of intermediates, NiN<sub>4</sub>-N<sub>3</sub>V<sub>1</sub>/NC and *i*-PrOH molecule, respectively;

$\Delta G_{INT} = G_{INT} - (G_{NiN_4-N_3V_1/NC} + G_{i-PrOH})$ , where  $G_{INT}$ ,  $G_{NiN_4-N_3V_1/NC}$  and  $G_{i-PrOH}$  are the free energies of intermediates, NiN<sub>4</sub>-N<sub>3</sub>V<sub>1</sub>/NC and *i*-PrOH molecule, respectively.

**Table S3.** The energies <sup>a</sup> of the key species involved in Fig. 2b.

| INT                                                                     | $E_{DFT}$<br>(eV) | ZPE<br>(eV) | $\Delta U_{(0 \rightarrow T)}$<br>(eV) | $H$<br>(eV) | $\Delta H$<br>(eV) | $T^*S$<br>(eV) | $G$<br>(eV) | $\Delta G$<br>(eV) |
|-------------------------------------------------------------------------|-------------------|-------------|----------------------------------------|-------------|--------------------|----------------|-------------|--------------------|
| NiN <sub>4</sub> -N <sub>3</sub> V <sub>1</sub> /NC<br>+ <i>i</i> -PrOH | -697.637          | 14.27       | 1.80                                   | -681.529    | 0.00               | 3.94           | -685.469    | 0.00               |
| <b>B-RC</b>                                                             | -698.207          | 14.30       | 1.87                                   | -682.033    | -0.50              | 3.38           | -685.416    | 0.05               |
| <b>B-TS1<sub>N5</sub></b>                                               | -697.480          | 14.21       | 1.80                                   | -681.467    | 0.06               | 3.18           | -684.646    | 0.82               |
| <b>B-IM1<sub>N5</sub></b>                                               | -697.842          | 14.25       | 1.83                                   | -681.765    | -0.24              | 3.28           | -685.047    | 0.42               |
| <b>B-TS1<sub>N6</sub></b>                                               | -697.425          | 14.19       | 1.84                                   | -681.391    | 0.14               | 3.29           | -684.677    | 0.79               |
| <b>B-IM1<sub>N6</sub></b>                                               | -697.887          | 14.22       | 1.83                                   | -681.835    | -0.31              | 3.27           | -685.109    | 0.36               |
| <b>B-TS1<sub>N7</sub></b>                                               | -697.508          | 14.20       | 1.83                                   | -681.469    | 0.06               | 3.27           | -684.739    | 0.73               |
| <b>B-IM1<sub>N7</sub></b>                                               | -697.877          | 14.23       | 1.83                                   | -681.817    | -0.29              | 3.28           | -685.096    | 0.37               |
| <b>B-IM2</b>                                                            | -698.054          | 14.21       | 1.86                                   | -681.987    | -0.46              | 3.32           | -685.311    | 0.16               |
| <b>B-TS2</b>                                                            | -697.795          | 14.12       | 1.85                                   | -681.827    | -0.30              | 3.29           | -685.120    | 0.35               |
| <b>B-IM3</b>                                                            | -698.013          | 14.13       | 1.89                                   | -681.995    | -0.47              | 3.43           | -685.429    | 0.04               |
| <b>B-IM4</b>                                                            | -697.625          | 14.09       | 1.85                                   | -682.280    | -0.75              | 3.98           | -685.660    | -0.19              |
| <b>B-IM2'</b>                                                           | -698.415          | 14.29       | 1.85                                   | -681.377    | 0.15               | 3.29           | -685.567    | -0.10              |
| <b>B-TS2'</b>                                                           | -697.350          | 14.14       | 1.84                                   | -682.430    | -0.90              | 3.27           | -684.644    | 0.83               |
| <b>B-IM3'</b>                                                           | -698.554          | 14.29       | 1.84                                   | -681.469    | 0.06               | 3.31           | -685.739    | -0.27              |
| <b>H&amp;H*</b><br>+acetone                                             | -697.625          | 14.09       | 1.82                                   | -681.678    | -0.15              | 3.98           | -685.660    | -0.19              |

<sup>a</sup> $\Delta H_{INT} = H_{INT} - (H_{NiN_4-N_3V_1/NC} + H_{i-PrOH})$ , where  $H_{INT}$ ,  $H_{NiN_4-N_3V_1/NC}$ ,  $H_{i-PrOH}$  are the enthalpy of intermediates, NiN<sub>4</sub>-N<sub>3</sub>V<sub>1</sub>/NC and *i*-PrOH molecule, respectively;

$\Delta G_{INT} = G_{INT} - (G_{NiN_4-N_3V_1/NC} + G_{i-PrOH})$ , where  $G_{INT}$ ,  $G_{NiN_4-N_3V_1/NC}$ ,  $G_{i-PrOH}$  are the free energies of intermediates, NiN<sub>4</sub>-N<sub>3</sub>V<sub>1</sub>/NC and *i*-PrOH molecule, respectively.

**Table S4.** The energies <sup>a</sup> of the key species involved in Fig. 4.

| INT           | $E_{DFT}$<br>(eV) | ZPE<br>(eV) | $\Delta U_{(0 \rightarrow T)}$<br>(eV) | $H$<br>(eV) | $\Delta H$<br>(eV) | $T^*S$<br>(eV) | $G$<br>(eV) | $\Delta G$<br>(eV) |
|---------------|-------------------|-------------|----------------------------------------|-------------|--------------------|----------------|-------------|--------------------|
| <b>C-IM1</b>  | -714.090          | 14.00       | 1.92                                   | -698.164    | 0.00               | 3.48           | -701.642    | 0.00               |
| <b>C-IM2</b>  | -714.327          | 14.07       | 1.86                                   | -698.394    | -0.23              | 3.31           | -701.709    | -0.07              |
| <b>C-IM1'</b> | -714.140          | 14.01       | 1.92                                   | -698.211    | 0.00               | 3.48           | -701.688    | 0.00               |
| <b>C-IM2'</b> | -710.435          | 13.91       | 1.94                                   | -694.585    | 3.63               | 3.52           | -698.106    | 3.58               |
| <b>D-IM1</b>  | -714.048          | 14.00       | 1.89                                   | -698.154    | 0.00               | 3.40           | -701.552    | 0.00               |
| <b>D-IM2</b>  | -715.050          | 14.15       | 1.91                                   | -698.995    | -0.84              | 3.44           | -702.432    | -0.88              |
| <b>D-IM1'</b> | -714.140          | 14.01       | 1.92                                   | -698.210    | 0.00               | 3.48           | -701.686    | 0.00               |
| <b>D-IM2'</b> | -711.355          | 13.91       | 1.94                                   | -695.505    | 2.71               | 3.52           | -699.026    | 2.66               |

<sup>a</sup> $\Delta H_{INT} = H_{INT} - H_{IM1/IM1'}$ , where  $H_{INT}$ , and  $H_{IM1/IM1'}$  are the enthalpy of intermediates and **IM1/IM1'**, respectively;

$\Delta G_{INT} = G_{INT} - G_{IM1/IM1'}$ , where  $G_{INT}$ , and  $G_{IM1/IM1'}$  are the free energies of intermediates and **IM1/IM1'**, respectively.

**Table S5.** The energies<sup>a</sup> of the key species involved in Fig. 5a.

| INT                                                        | $E_{DFT}$<br>(eV) | ZPE<br>(eV) | $\Delta U_{(0 \rightarrow T)}$<br>(eV) | $H$<br>(eV) | $\Delta H$<br>(eV) | $T^*S$<br>(eV) | $G$<br>(eV) | $\Delta G$<br>(eV) |
|------------------------------------------------------------|-------------------|-------------|----------------------------------------|-------------|--------------------|----------------|-------------|--------------------|
| <b>H&amp;H*</b><br>+FF                                     | -713.629          | 13.98       | 1.80                                   | -697.770    | 0.00               | 4.04           | -701.813    | 0.00               |
| <b>C-IM1</b>                                               | -714.090          | 14.00       | 1.92                                   | -698.164    | -0.39              | 3.48           | -701.642    | 0.17               |
| <b>C-TS1</b>                                               | -714.040          | 13.98       | 1.88                                   | -698.174    | -0.40              | 3.36           | -701.534    | 0.28               |
| <b>C-IM2</b>                                               | -714.327          | 14.07       | 1.86                                   | -698.394    | -0.62              | 3.31           | -701.709    | 0.10               |
| <b>C-IM3</b>                                               | -714.154          | 14.10       | 1.90                                   | -698.158    | -0.39              | 3.42           | -701.581    | 0.23               |
| <b>C-TS2</b>                                               | -713.746          | 14.07       | 1.87                                   | -697.805    | -0.03              | 3.35           | -701.153    | 0.66               |
| <b>C-IM4</b>                                               | -714.423          | 14.17       | 1.91                                   | -698.344    | -0.57              | 3.45           | -701.795    | 0.02               |
| NiN <sub>4</sub> -N <sub>3</sub> V <sub>1</sub> /NC<br>+FA | -713.618          | 14.13       | 1.95                                   | -697.600    | 0.17               | 4.13           | -701.728    | 0.08               |

<sup>a</sup> $\Delta H_{INT} = H_{INT} - (H_{H\&H^*} + H_{FF})$ , where  $H_{INT}$ ,  $H_{H\&H^*}$  and  $H_{FF}$  are the enthalpy of intermediates, H&H\* and FF molecule, respectively;

$\Delta G_{INT} = G_{INT} - (G_{H\&H^*} + G_{FF})$ , where  $G_{INT}$ ,  $G_{H\&H^*}$  and  $G_{FF}$  are the free energies of intermediates, H&H\* and FF molecule, respectively.

**Table S6.** The energies<sup>a</sup> of the key species involved in Fig. 5b.

| INT                                                        | $E_{DFT}$<br>(eV) | ZPE<br>(eV) | $\Delta U_{(0 \rightarrow T)}$<br>(eV) | $H$<br>(eV) | $\Delta H$<br>(eV) | $T^*S$<br>(eV) | $G$<br>(eV) | $\Delta G$<br>(eV) |
|------------------------------------------------------------|-------------------|-------------|----------------------------------------|-------------|--------------------|----------------|-------------|--------------------|
| <b>H&amp;H*</b><br>+FF                                     | -713.629          | 13.98       | 1.80                                   | -697.770    | 0.00               | 4.04           | -701.813    | 0.00               |
| <b>D-IM1</b>                                               | -714.048          | 14.00       | 1.89                                   | -698.154    | -0.38              | 3.40           | -701.552    | 0.26               |
| <b>D-TS2</b>                                               | -714.013          | 13.99       | 1.86                                   | -698.166    | -0.40              | 3.31           | -701.474    | 0.34               |
| <b>D-IM2</b>                                               | -715.050          | 14.15       | 1.91                                   | -698.995    | -1.23              | 3.44           | -702.432    | -0.62              |
| <b>D-IM3</b>                                               | -715.002          | 14.15       | 1.91                                   | -698.938    | -1.17              | 3.45           | -702.391    | -0.58              |
| <b>D-TS2</b>                                               | -713.428          | 14.03       | 1.86                                   | -697.543    | 0.23               | 3.28           | -700.820    | 0.99               |
| <b>D-IM4</b>                                               | -714.161          | 14.16       | 1.93                                   | -698.075    | -0.31              | 3.51           | -701.589    | 0.22               |
| NiN <sub>4</sub> -N <sub>3</sub> V <sub>1</sub> /NC<br>+FA | -713.618          | 14.13       | 1.95                                   | -697.600    | 0.17               | 4.13           | -701.728    | 0.08               |

<sup>a</sup> $\Delta H_{INT} = H_{INT} - (H_{H\&H^*} + H_{FF})$ , where  $H_{INT}$ ,  $H_{H\&H^*}$  and  $H_{FF}$  are the enthalpy of intermediates, H&H\* and FF molecule, respectively;

$\Delta G_{INT} = G_{INT} - (G_{H\&H^*} + G_{FF})$ , where  $G_{INT}$ ,  $G_{H\&H^*}$  and  $G_{FF}$  are the free energies of intermediates, H&H\* and FF molecule, respectively.



**Table S7.** The energies<sup>a</sup> of the key species involved in Fig. S1.

| INT                                                         | $E_{DFT}$<br>(eV) | ZPE<br>(eV) | $\Delta U_{(0 \rightarrow T)}$<br>(eV) | $H$<br>(eV) | $\Delta H$<br>(eV) | $T^*S$<br>(eV) | $G$<br>(eV) | $\Delta G$<br>(eV) |
|-------------------------------------------------------------|-------------------|-------------|----------------------------------------|-------------|--------------------|----------------|-------------|--------------------|
| NiN <sub>4</sub> /NC<br>+ <i>i</i> -PrOH                    | -342.791          | 7.84        | 0.90                                   | -334.015    | 0.00               | 2.30           | -336.320    | 0.00               |
| <b>RC<sub>a</sub></b>                                       | -343.099          | 7.85        | 0.93                                   | -334.324    | -0.31              | 1.66           | -335.983    | 0.34               |
| <b>IM1<sub>a</sub></b>                                      | -339.665          | 7.57        | 0.96                                   | -331.136    | 2.88               | 1.76           | -332.895    | 3.43               |
| <b>IM2<sub>a</sub></b>                                      | -339.911          | 7.76        | 0.96                                   | -331.190    | 2.83               | 1.74           | -332.926    | 3.39               |
| <b>RC<sub>a</sub>'</b>                                      | -343.154          | 7.86        | 0.98                                   | -334.310    | -0.29              | 1.81           | -336.123    | 0.20               |
| <b>IM3<sub>a</sub></b>                                      | -339.125          | 7.59        | 0.90                                   | -330.634    | 3.38               | 1.60           | -332.238    | 4.08               |
| <b>IM4<sub>a</sub></b>                                      | -339.453          | 7.75        | 0.91                                   | -330.799    | 3.22               | 1.60           | -332.402    | 3.92               |
| N <sub>1</sub><br>+ <i>i</i> -PrOH                          | -358.213          | 8.23        | 0.86                                   | -349.091    | 0.00               | 2.22           | -351.314    | 0.00               |
| <b>RC<sub>b</sub></b>                                       | -358.522          | 8.25        | 0.94                                   | -349.327    | -0.24              | 1.74           | -351.064    | 0.25               |
| <b>IM1<sub>b</sub></b>                                      | -354.840          | 8.23        | 0.93                                   | -345.681    | 3.41               | 1.71           | -347.394    | 3.92               |
| <b>RC<sub>b</sub>'</b>                                      | -358.532          | 8.25        | 0.91                                   | -349.369    | -0.28              | 1.64           | -351.009    | 0.31               |
| <b>IM2<sub>b</sub></b>                                      | -353.953          | 7.94        | 0.96                                   | -345.050    | 4.04               | 1.80           | -346.853    | 4.46               |
| N <sub>1</sub> V <sub>1</sub><br>+ <i>i</i> -PrOH           | -344.769          | 7.97        | 0.88                                   | -335.888    | 0.00               | 2.30           | -338.187    | 0.00               |
| <b>RC<sub>c</sub></b>                                       | -345.088          | 7.98        | 0.93                                   | -336.171    | -0.28              | 1.73           | -337.905    | 0.28               |
| <b>IM1<sub>c</sub></b>                                      | -344.316          | 8.00        | 0.93                                   | -335.390    | 0.50               | 1.68           | -337.073    | 1.11               |
| <b>RC<sub>c</sub>'</b>                                      | -345.158          | 7.99        | 0.95                                   | -336.214    | -0.33              | 1.77           | -337.989    | 0.20               |
| <b>IM2<sub>c</sub></b>                                      | -343.653          | 7.97        | 0.92                                   | -334.761    | 1.13               | 1.68           | -336.439    | 1.75               |
| pyridinic N <sub>3</sub> V <sub>1</sub><br>+ <i>i</i> -PrOH | -344.491          | 7.84        | 0.85                                   | -335.767    | 0.00               | 2.22           | -337.990    | 0.00               |
| <b>RC<sub>d</sub></b>                                       | -344.897          | 7.91        | 0.95                                   | -336.039    | -0.27              | 1.76           | -337.797    | 0.19               |
| <b>IM1<sub>d</sub></b>                                      | -345.671          | 7.92        | 0.91                                   | -336.841    | -1.07              | 1.64           | -338.480    | -0.49              |
| <b>RC<sub>d</sub>'</b>                                      | -345.068          | 7.94        | 0.92                                   | -336.202    | -0.44              | 1.68           | -337.886    | 0.10               |
| <b>IM2<sub>d</sub></b>                                      | -345.105          | 7.93        | 0.94                                   | -336.230    | -0.46              | 1.75           | -337.978    | 0.01               |
| pyridinic N <sub>4</sub> V <sub>2</sub><br>+ <i>i</i> -PrOH | -334.260          | 7.73        | 0.85                                   | -325.646    | 0.00               | 2.23           | -327.878    | 0.00               |
| <b>RC<sub>e</sub></b>                                       | -334.685          | 7.76        | 0.93                                   | -326.001    | -0.35              | 1.72           | -327.718    | 0.16               |
| <b>IM1<sub>e</sub></b>                                      | -334.681          | 7.74        | 0.92                                   | -326.028    | -0.38              | 1.66           | -327.689    | 0.19               |
| <b>RC<sub>e</sub>'</b>                                      | -334.837          | 7.77        | 0.94                                   | -326.124    | -0.48              | 1.77           | -327.896    | -0.02              |
| <b>IM2<sub>e</sub></b>                                      | -334.121          | 7.72        | 0.94                                   | -325.460    | 0.19               | 1.74           | -327.202    | 0.68               |
| pyridinic N <sub>2</sub> V <sub>2</sub><br>+ <i>i</i> -PrOH | -332.622          | 7.73        | 0.88                                   | -323.983    | 0.00               | 2.30           | -326.279    | 0.00               |
| <b>RC<sub>f</sub></b>                                       | -332.997          | 7.75        | 0.93                                   | -324.322    | -0.34              | 1.71           | -326.037    | 0.24               |
| <b>IM1<sub>f</sub></b>                                      | -333.869          | 7.75        | 0.93                                   | -325.195    | -1.21              | 1.71           | -326.901    | -0.62              |
| <b>RC<sub>f</sub>'</b>                                      | -333.073          | 7.75        | 0.95                                   | -324.368    | -0.39              | 1.79           | -326.159    | 0.12               |
| <b>IM2<sub>f</sub></b>                                      | -333.180          | 7.72        | 0.94                                   | -324.514    | -0.53              | 1.76           | -326.273    | 0.01               |
| <b>IM3<sub>f</sub></b>                                      | -337.057          | 7.81        | 0.94                                   | -328.307    | -3.98              | 1.78           | -330.086    | -3.81              |

Continued **Table S7**

| INT                                   | $E_{DFT}$<br>(eV) | ZPE<br>(eV) | $\Delta U_{(0 \rightarrow T)}$<br>(eV) | $H$<br>(eV) | $\Delta H$<br>(eV) | $T^*S$<br>(eV) | $G$<br>(eV) | $\Delta G$<br>(eV) |
|---------------------------------------|-------------------|-------------|----------------------------------------|-------------|--------------------|----------------|-------------|--------------------|
| pyrrolic $N_3V_1$<br>+ <i>i</i> -PrOH | -342.841          | 7.92        | 0.89                                   | -333.989    | 0.00               | 2.34           | -336.326    | 0.00               |
| <b>RC<sub>g</sub></b>                 | -343.203          | 7.95        | 0.97                                   | -334.284    | -0.29              | 1.82           | -336.107    | 0.22               |
| <b>IM1<sub>g</sub></b>                | -343.869          | 7.96        | 0.98                                   | -334.928    | -0.94              | 1.84           | -336.764    | -0.44              |
| <b>RC<sub>g</sub>'</b>                | -343.371          | 7.96        | 0.95                                   | -334.465    | -0.48              | 1.74           | -336.209    | 0.12               |
| <b>IM2<sub>g</sub></b>                | -343.209          | 7.94        | 0.96                                   | -334.306    | -0.32              | 1.80           | -336.109    | 0.22               |

$^a\Delta H_{INT} = H_{INT} - (H_{catalyst} + H_{i-PrOH})$ , where  $H_{INT}$ ,  $H_{catalyst}$  and  $H_{i-PrOH}$  are the enthalpy of intermediates, free catalyst and *i*-PrOH molecule, respectively;

$\Delta G_{INT} = G_{INT} - (G_{catalyst} + G_{i-PrOH})$ , where  $G_{INT}$ ,  $G_{catalyst}$  and  $G_{i-PrOH}$  are the free energies of intermediates, free catalyst and *i*-PrOH molecule, respectively.

**Table S8.** The energies<sup>a</sup> of the key species involved in Fig. S2.

| INT                   | $E_{DFT}$<br>(eV) | ZPE<br>(eV) | $\Delta U_{(0 \rightarrow T)}$<br>(eV) | $H$<br>(eV) | $\Delta H$<br>(eV) | $T^*S$<br>(eV) | $G$<br>(eV) | $\Delta G$<br>(eV) |
|-----------------------|-------------------|-------------|----------------------------------------|-------------|--------------------|----------------|-------------|--------------------|
| <b>B-IM2'</b><br>+ FF | -770.462          | 16.38       | 2.10                                   | -751.045    | 0.00               | 4.60           | -756.551    | 0.00               |
| <b>E-IM1</b>          | -770.878          | 16.40       | 2.18                                   | -752.295    | -1.25              | 4.05           | -756.344    | 0.21               |
| <b>E-TS1</b>          | -770.062          | 16.30       | 2.14                                   | -751.616    | -0.57              | 3.92           | -755.533    | 1.02               |
| <b>E-IM2</b>          | -770.509          | 16.32       | 2.17                                   | -752.017    | -0.97              | 4.06           | -756.078    | 0.48               |
| <b>E-IM1'</b>         | -770.967          | 16.41       | 2.18                                   | -752.382    | -1.34              | 4.04           | -756.425    | 0.13               |
| <b>E-TS1'</b>         | -770.291          | 16.26       | 2.16                                   | -751.868    | -0.82              | 3.98           | -755.844    | 0.71               |
| <b>E-IM2'</b>         | -771.379          | 16.37       | 2.19                                   | -752.814    | -1.77              | 4.11           | -756.925    | -0.37              |

$^a\Delta H_{INT} = H_{INT} - (H_{B-IM2'} + H_{FF})$ , where  $H_{INT}$ ,  $H_{B-IM2'}$  and  $H_{FF}$  are the enthalpy of intermediates, **B-IM2'** and FF molecule, respectively;

$\Delta G_{INT} = G_{INT} - (G_{B-IM2'} + G_{FF})$ , where  $G_{INT}$ ,  $G_{B-IM2'}$  and  $G_{FF}$  are the free energies of intermediates, **B-IM2'** and FF molecule, respectively.
